# Supplementary material for: Resources for reasoning of chemistry concepts: multimodal molecular geometry
Source: Royal Society of Chemistry journal article supplement (doi:10.1039/d3rp00186e), 2024-01-01

## Table 4: Supplementary Material

*Student verbal utterances mapped against accompanying gestures. Case 1 example illustrates the cooperative use of speech and gesture.*

| CASE 1                                                                          |                                                                                                                   |              |                                                                                      |
|---------------------------------------------------------------------------------|-------------------------------------------------------------------------------------------------------------------|--------------|--------------------------------------------------------------------------------------|
| Verbal Utterances                                                               | Gesture Description                                                                                               | Gesture Type | Gestures                                                                             |
| 1. "So, $NH_3$ , also known as ammonium... is shaped.... so the N is the top.." | Student 15 points in mid-air.                                                                                     | Deictic      |    |
| 2. "...3..."                                                                    | Student uses two hands, palms facing, to make a triangular shape, as if imitating the pitched roof of a building. | Iconic       |   |
| 3. "... you've got H.."                                                         | Dragging forwards out of plane.                                                                                   | Deictic      |  |
| 4. "...H..."                                                                    | Dragging downwards within the plane.                                                                              | Deictic      |  |
| 5. "...H..."                                                                    | Dragging backwards into plane from the first.                                                                     | Deictic      |  |
| silence                                                                         | Student makes small circles in air with finger tip in line of plane, out of plane, into plane.                    | Deictic      |  |

## Table 4: Supplementary Material

*Student verbal utterances mapped against accompanying gestures. Case 1 example illustrates the cooperative use of speech and gesture.*

6. "So they're all on the bottom half, just due to the eh, general structural... difficulties within the chemical world...so..."

*Student uses one hand with spread fingers and gestures a dragging downwards motion in air from a higher starting position.*

*Deictic-Iconic*

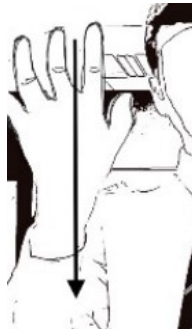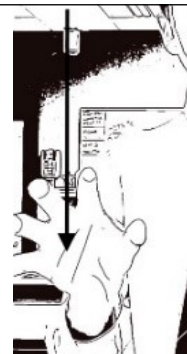

7. "You've got N and then 3 Hs on the bottom, which of course will be trigonal pyramidal..."

*Student uses both hands to form a triangular shape.*

*Deictic-Iconic*

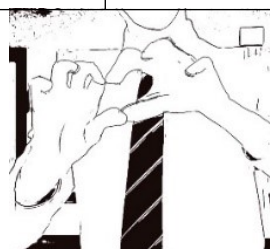

8. "...instead of tetrahedral which has one at the top..."

*Student points upwards in mid-air.*

*Deictic*

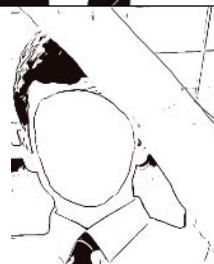

Supplement: d3rp00186e1.pdf [file d3rp00186e1.pdf]
